# Supplementary material
Source: PubMed Central journal article supplement (PMC7497709)
Supplement: jp9b11043_si_001.pdf [file jp9b11043_si_001.pdf]

# Yttrium-Doped Iron Oxide Nanoparticles for Magnetic Hyperthermia Applications

*Przemyslaw Kowalik<sup>a</sup>, Jakub Mikulski<sup>a</sup>, Anna Borodziuk<sup>a</sup>, Magdalena Duda<sup>a</sup>, Izabela Kaminska<sup>a</sup>, Karolina Zajdel<sup>c</sup>, Jaroslaw Rybusinski<sup>b</sup>, Jacek Szczytko<sup>b</sup>, Tomasz Wojciechowski<sup>a</sup>, Kamil Sobczak<sup>d</sup>, Roman Minikayev<sup>a</sup>, Magdalena Kulpa-Greszta<sup>e</sup>, Robert Pazik<sup>f</sup>, Paulina Grzackowska<sup>a,b</sup>, Krzysztof Fronc<sup>a</sup>, Mariusz Lapinski<sup>g</sup>, Malgorzata Frontczak-Baniewicz<sup>c</sup>, Bozena Sikora<sup>a\*</sup>*

*<sup>a</sup> Institute of Physics, Polish Academy of Sciences, Al. Lotnikow 42/46, PL-02668, Warsaw, Poland; <sup>b</sup> Institute of Experimental Physics, Faculty of Physics, University of Warsaw, ul. Pasteura 5, PL-02093, Warsaw, Poland; <sup>c</sup> Mossakowski Medical Research Centre, Polish Academy of Sciences, ul. Pawinskiego 5, PL-02106, Warsaw, Poland; <sup>d</sup> Faculty of Chemistry, Biological and Chemical Research Centre, University of Warsaw, ul. Zwirki i Wigury 101, PL-02089, Warsaw, Poland; <sup>e</sup> Faculty of Chemistry, Rzeszow University of Technology, Al. Powstancow Warszawy 12, PL-35959 Rzeszow, Poland; <sup>f</sup> Faculty of Biotechnology, University of Rzeszow, Ul. Pigionia 1, PL-35310 Rzeszow, Poland; <sup>g</sup> Department of Hypertension, Medical University of Warsaw, ul. Zwirki i Wigury 61, PL-02091, Warsaw, Poland*

*\*sikorab@ifpan.edu.pl*

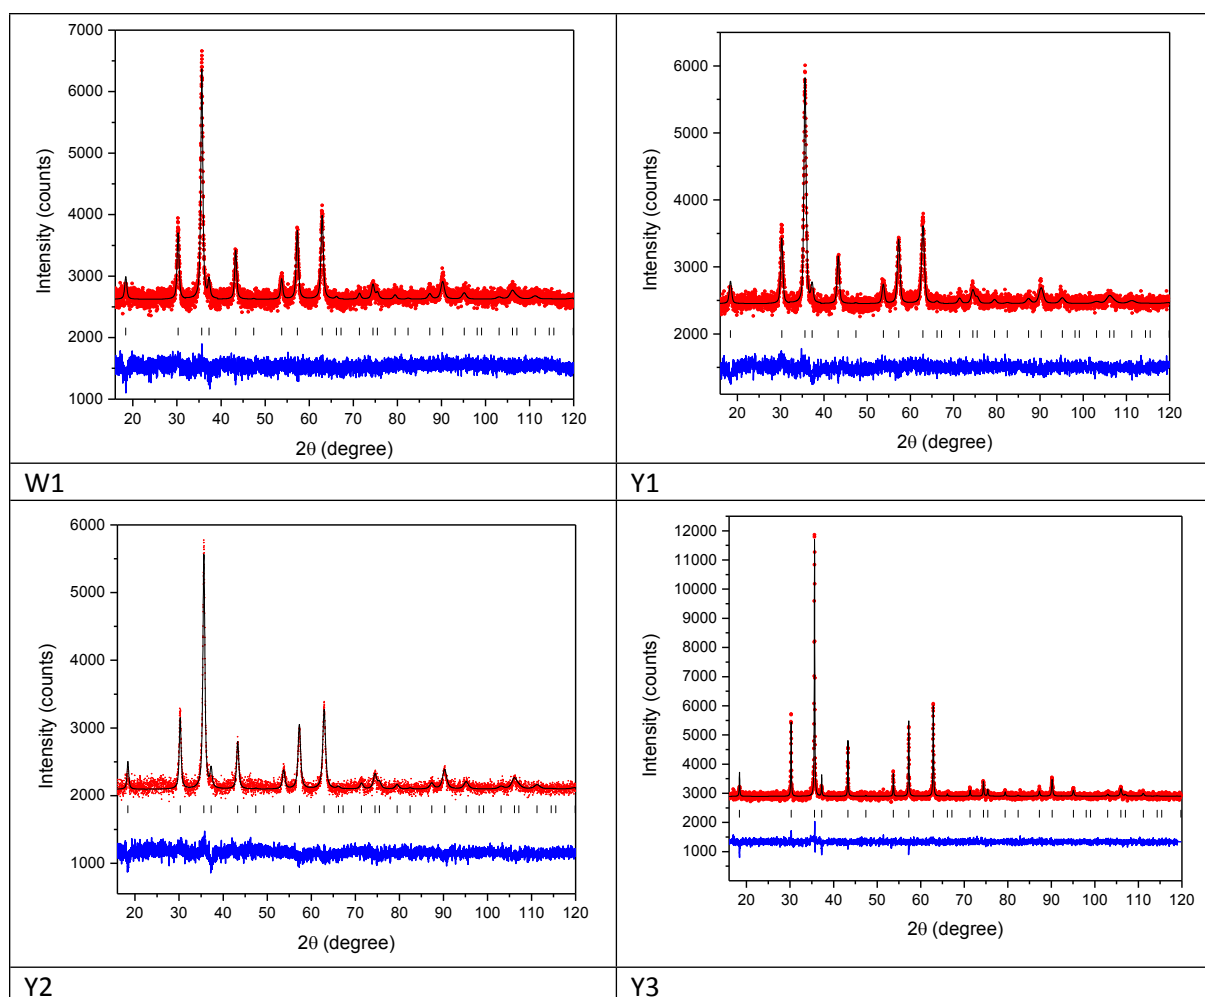

**Figure S1.** X-ray diffraction patterns of the Fe<sub>3</sub>O<sub>4</sub> nanoparticles as a function of Y<sup>3+</sup> cations content with Rietveld method theoretical fitting. Symbols: (●) experimental and (—) fitted diffractograms, (—) differential curve and (|) positions of Bragg reflections are indicated by bars below the diffraction curve.

**Table S1.** The crystallographic model for Fe<sub>3</sub>O<sub>4</sub>:Y nanoparticles.

| Atom name | Atomic positions |          |          |
|-----------|------------------|----------|----------|
|           | x                | y        | z        |
| Fe        | 0.125            | 0.125    | 0.125    |
| Fe/Y      | 0.5              | 0.5      | 0.5      |
| O         | 0.248(1)         | 0.248(1) | 0.248(1) |
